# Supplementary material
Source: publisher figshare collection journal article supplement (https://sage.figshare.com/ndownloader/files/17059523)
Supplement: Supplementary file 1 [file 17059523]

## **Methodology File**

### **Appendix A**

#### *Passages Used in Studies 1-3*

##### **Study 1—Active Voice:**

In March 2019, my family and I will travel to France. I am excited about the trip because I have a French background and our family eats French food (my father is French) and the entire family, including my two sisters, speaks French, and so I have always had a longing to visit France. My uncle who lives in the 13th arrondissement will meet us at Orly airport. My uncle, however, will need the car for a few days for work, and so he has already bought train passes for our travel to Mont St. Michel for those few days. If all goes well, I will have a truly French meal experience for the first time—we will break bread, we will drink red wine, and my aunt will bake crème brûlée in the oven, as this is the first time my father and his brother will see each other in over 10 years.

##### **Study 1—Passive Voice:**

In March 2019, my family and I will travel to France. I am excited about the trip because I have a French background and French food is eaten in our family (my father is French) and French is spoken by the entire family, including my two sisters, and so I have always had a longing to visit France. We will be met at Orly airport by my uncle who lives in the 13th arrondissement. My uncle, however, will need the car for a few days for work, and so train passes have already been bought by him for our travel to Mont St. Michel for those few days. If all goes well, I will have a truly French meal experience for the first time—bread will be broken, red wine will be drunk, and crème brûlée will be baked in the oven by my aunt, as this is the first time my father and his brother will see each other in over 10 years.

##### **Study 2—Active Voice:**

Physical cleansing is a focal element in religious ceremonies for thousands of years. The prevalence of this practice suggests a psychological association between bodily purity and moral purity. In three studies, we explore what we call the “Macbeth effect”—that is, a threat to one’s moral purity can induce the need to cleanse oneself. We reveal this effect through an increased mental accessibility of cleansing-related concepts, a greater desire for cleansing products, and a greater likelihood of taking antiseptic wipes. Furthermore, we show that physical cleansing can alleviate the upsetting consequences of unethical behaviour and can reduce threats to one’s moral self-image. Daily hygiene routines such as washing hands, as simple and benign as they might seem, can deliver a powerful antidote to threatened morality, enabling people to truly wash away their sins.

##### **Study 2—Passive Voice:**

Physical cleansing is a focal element in religious ceremonies for thousands of years. A

psychological association between bodily purity and moral purity is suggested by the prevalence of this practice. In three studies, we explore what we call the “Macbeth effect”—that is, the need to cleanse oneself can be induced by a threat to one’s morality. This effect is revealed by us through an increased mental accessibility of cleansing-related concepts, a greater desire for cleansing products, and a greater likelihood of taking antiseptic wipes. Furthermore, we show that the upsetting consequences of unethical behaviour can be alleviated and threats to one’s moral self-image can be reduced by physical cleansing. Daily hygiene routines such as washing hands, as simple and benign as they might seem, can deliver a powerful antidote to threatened morality, enabling people to truly wash away their sins.

### **Study 3—Active Voice:**

Last month, my family and I experienced a hurricane for the first time in North Carolina, USA. It was Hurricane Florence, and its fierce winds of 200 kilometres per hour and its heavy rains caused much damage to our property and neighbourhood. Water, which rose to a height of half a metre, flooded our living room. When we began to think that the worst of the storm was over, we heard a loud crash and looked out the window to see that our neighbour’s fallen tree had hit our car. Next time, when officials advise people in our area to evacuate, I’m sure that our family will be the first to leave.

### **Study 3—Passive Voice:**

Last month, a hurricane was experienced by my family and me for the first time in North Carolina, USA. It was Hurricane Florence, and much damage to our property and neighbourhood was caused by its fierce winds of 200 kilometres per hour and its heavy rains. Our living room was flooded by the water, which rose to a height of half a metre. When we began to think that the worst of the storm was over, we heard a loud crash and looked out the window to see that our car had been hit by our neighbour’s fallen tree. Next time, when people in our area are advised by officials to evacuate, I’m sure that our family will be the first to leave.

## **Appendix B**

### *Passages Used in Study 4*

#### **Passage A—Active:**

One summer, along about 1904, my father rented a camp on a lake in Maine, and he took us there for August. Some kittens gave us ringworm, and we had to rub Pond's Extract on our arms and legs night and morning. Also, my father rolled over a canoe with him in it with all his clothes on. Outside of that, we all thought the vacation was a success, and from then on it we thought that there was no place like that lake in Maine.

#### **Passage A—Passive:**

One summer, along about 1904, a camp was rented by my father on a lake in Maine, and we were taken by him there for August. Ringworm was given to us by some kittens, and Pond's Extract had to be rubbed by us on our arms and legs night and morning. Also, a canoe was rolled over by my father with him in it, with all his clothes on. Outside of that, the vacation was thought by us all to be a success, and from then on it was thought by us that there was no place like that lake in Maine.

#### **Passage B—Active:**

Joey, my roommate, is not a rude guy, or anything. Far from it, he's actually friendly and good-natured. But, Joey drives away women from my life because of his lack of house cleaning. Our apartment is the social equivalent of a cancerous tumor. When one of my dates enters the building, the first object that she notices is someone's half-eaten apple on the carpet. Meanwhile, a slice of week-old pizza droops over the edge of the television. Thus, I need a new roommate. Otherwise, Joey will destroy my love life.

#### **Passage B—Passive:**

Joey, my roommate, is not a rude guy, or anything. Far from it, he's actually friendly and good-natured. But, women are driven away from my life by Joey because of his lack of house cleaning. Our apartment is the social equivalent of a cancerous tumor. When the building is entered by one of my dates, the first object that is noticed by her is an apple half-eaten by someone on the carpet. Meanwhile, the edge of the television is drooped over by a slice of week-old pizza. Thus, a new roommate is needed by me. Otherwise, my love life will be destroyed by Joey.

#### **Passage C—Active:**

Last summer, I painted our house. The job took about two weeks. First, I washed the exterior using warm water and a mild detergent. Then I sealed all the chinks and pores in the walls with putty. After the putty had had a chance to dry, I could paint the exterior. I used a latex paint

because it was easy to apply and cleans up with water. I needed a whole week to finish this part of the job. When I finished the job, I felt a great deal of satisfaction. I had to pat myself on the back. Even my dad said that I did a good job.

**Passage C—Passive:**

Last summer, our house was painted by me. The job took about two weeks. First, the exterior was washed by me using warm water and a mild detergent. Then all the chinks and pores in the walls were sealed by me with putty. After the putty had had a chance to dry, the exterior could be painted by me. A latex paint was used by me because it was easy to apply and cleans up with water. A whole week was needed by me to finish this part of the job. When the job was finished by me, a great deal of satisfaction was felt by me. I had to pat myself on the back. Even my dad said that a good job was done by me.

**Passage D—Active:**

Martin Scorsese makes wonderful films. He shoots each frame carefully and each set includes the smallest of details. That is because Scorsese demands excellence from his crew. And he expects his crew to fulfill his vision. Scorsese directs each actor with sensitivity and skill. He carefully choreographs every move and every word. Yet he makes it all to appear completely natural. That is the mark of a truly great director. And that is why moviegoers and critics alike treasure his work. The movies Scorsese makes will surely distinguish themselves for many years to come.

**Passage D—Passive:**

Wonderful films are made by Martin Scorsese. Each frame is shot carefully by him and the smallest of details is included in each set. That is because excellence is demanded by Scorsese from his crew. And the crew is expected by him to fulfill his vision. Each actor is directed by Scorsese with sensitivity and skill. Every move and every word is carefully choreographed by him. Yet it is all made by him to appear completely natural. That is the mark of a truly great director. And that is why his work is treasured by moviegoers and critics alike. The movies made by Scorsese will surely distinguish themselves for many years to come.

**Passage E—Active:**

Dr. Wheeler entered the room, at which point he spoke words of advice regarding active verbs. The rebellious class decided that they would write the final paper of the semester entirely in the passive voice. A distraught Wheeler made remarks; the students made protests. One student got out of a seat. He stood upon his desk and he made a vow that he would never write another active sentence. The student challenged Wheeler to a duel. His peers later on found Wheeler standing over the bodies. He only spoke these words: "I made mistakes."

**Passage E—Passive:**

The room was entered by Dr. Wheeler, at which point words of advice regarding active verbs were spoken by him. It was decided by the rebellious class that the final paper of the semester would be written entirely in passive voice. Remarks were made by a distraught Wheeler; protests were made by the students. A seat was gotten out of by one student. His desk was stood upon by him and a vow was made by him that he would never write another active sentence. Wheeler was challenged to a duel by the student. Wheeler was found by his peers later on standing over the bodies. Only these words were spoken by him: "Mistakes were made by me."

## **Appendix C**

### *Paragraph and Sentence Used in Study 5*

#### **Sentence—Active:**

Harry ate six shrimps for dinner.

#### **Sentence—Passive:**

Six shrimps were eaten by Harry for dinner.

#### **Paragraph—Active:**

One night, Harry decided to go grocery shopping for dinner. In the garage, Harry started his Honda Civic, and then Harry drove the Civic to the grocery store. Once he got there, Harry took a shopping basket, and Harry walked several aisles looking for something to eat. Eventually, Harry found a package of shrimps, which he took to the checkout and paid for. Harry then drove the car home. Harry ate six shrimps for dinner.

#### **Paragraph—Passive:**

One night, a decision was made by Harry to go grocery shopping for dinner. In the garage, his Honda Civic was started by Harry, and then the Civic was driven from Harry's house to the grocery store. Once he got there, a shopping basket was taken by Harry, and several aisles were walked by Harry looking for something to eat. Eventually, a package of shrimps was found, which was taken to the checkout and was paid for by Harry. The car was then driven back home by Harry. Six shrimps were eaten by Harry for dinner.
